# Supplementary material
Source: PubMed Central journal article supplement (PMC5118487)
Supplement: ASN.2015111220SupplementaryData.pdf [file ASN.2015111220SupplementaryData.pdf]

## **Supplemental Information**

### **TABLES**

**Supplemental Table 1:** Disposition of all founders.

**Supplemental Table 2:** Semi-quantitative scoring of glomerular ultrastructural changes.

**Supplemental Table 3:** Standard serological chemistries in pregnant mice.

### **FIGURES**

**Supplemental Figure 1:** APOL1 was present in glomerular cells that were positive for Synaptopodin.

**Supplemental Figure 2:** No proteinuria in founders and aged animals of established lines.

**Supplemental Figure 3:** Corrected podocyte number and glomerular tuft volumes used in Figure 4 podocyte density calculations.

**Supplemental Figure 4:** Tg-G0 and Tg-G2 mice had pregnancy-associated hypertension.

**Supplemental Figure 5:** Endothelial changes in glomeruli of seizing pregnant mice.

**Supplemental Figure 6:** APOL1 was expressed in transgenic mouse and human placentas.

**Supplemental Figure 7:** Weaned litter sizes were smaller for Tg-G2.

**Supplemental Table 1. Disposition of all founders.**

| Transgene | Founder # | Sex | Age | Kidney expression | Comments                                                               |
|-----------|-----------|-----|-----|-------------------|------------------------------------------------------------------------|
| Tg-G2     | 18        | F   | 129 |                   | Died in 1 <sup>st</sup> pregnancy                                      |
|           | 19        | F   | 122 |                   | Died in 1 <sup>st</sup> pregnancy                                      |
|           | 20        | F   | 279 | -/+               | No/low transgene expression, discontinued breeding                     |
|           | 7         | M   | 275 | ++                | Never mated successfully                                               |
|           | 9         | M   | 275 | ++                | <b>Line established</b>                                                |
|           | 10        | M   | 201 | -/+               | No/low transgene expression, discontinued breeding                     |
|           | 23        | M   | 356 | ++                | Produced few transgenic pups, discontinued breeding                    |
|           | 24        | M   | 356 | ++                | <b>Line established</b>                                                |
| Tg-G0     | 1         | F   | 319 | +++               | Produced small litters, all pups died, discontinued breeding           |
|           | 3         | F   | 319 | -/+               | Never mated successfully                                               |
|           | 4         | F   | 319 | -/+               | No/low transgene expression, discontinued breeding                     |
|           | 10        | F   | 282 | -/+               | Produced small litters with few transgenic pups, discontinued breeding |
|           | 11        | F   | 319 | +++               | Never mated successfully                                               |
|           | 12        | F   | 359 | ++                | Redundant expression pattern, discontinued breeding                    |
|           | 13        | F   | 319 | -/+               | Produced few transgenic pups, discontinued breeding                    |
|           | 14        | F   | 319 | +                 | Produced small litters with few transgenic pups, discontinued breeding |
|           | 27        | F   | 314 | +++               | <b>Line established</b>                                                |
|           | 34        | F   | 314 | +                 | Produced small litters with few transgenic pups, discontinued breeding |
|           | 35        | F   | 145 |                   | Died in 1 <sup>st</sup> pregnancy                                      |
|           | 38        | F   | 277 | ++                | <b>Line established</b>                                                |
|           | 61        | F   | 134 |                   | Died in 1 <sup>st</sup> pregnancy                                      |
|           | 68        | F   | 210 |                   | Did not transmit transgene to offspring (chimera)                      |
|           | 20        | M   | 319 | -/+               | No/low transgene expression, discontinued breeding                     |
|           | 22        | M   | 282 | ++                | Redundant expression pattern, discontinued breeding                    |
|           | 24        | M   | 319 | ++                | <b>Line established</b>                                                |
|           | 25        | M   | 158 |                   | Never mated successfully, died of unknown cause (no signs of seizure)  |
|           | 45        | M   | 314 | +                 | Redundant expression pattern, discontinued breeding                    |
|           | 46        | M   | 277 | +                 | <b>Line established</b>                                                |
|           | 47        | M   | 314 | +++               | Redundant expression pattern, discontinued breeding                    |
|           | 48        | M   | 314 | +++               | Redundant expression pattern, discontinued breeding                    |
|           | 50        | M   | 314 | +                 | Redundant expression pattern, discontinued breeding                    |
|           | 53        | M   | 314 | +                 | Redundant expression pattern, discontinued breeding                    |
|           | 55        | M   | 314 | +                 | Redundant expression pattern, discontinued breeding                    |
|           | 56        | M   | 314 | ++                | Never mated successfully                                               |
|           | 58        | M   | 314 | +                 | Never mated successfully                                               |
|           | 69        | M   | 310 | ++                | Produced small litters with few transgenic pups, discontinued breeding |
|           | 73        | M   | 227 |                   | Did not transmit transgene to offspring (chimera)                      |

Four additional founders (2 Tg-G0 and 2 Tg-G2) were sacrificed before breeding for preliminary technical evaluation and are not included here. Age is the age of death or terminal sacrifice. Expression data on semi-quantitative scale: -/+, +, ++, +++.

**Supplemental Table 2:** Semi-Quantitative Scoring of Glomerular Ultrastructural Changes.

| Genotype  | Sex | Age (days) | GBM <sup>1</sup> | Podocyte <sup>2</sup> | Total score | Mean Total score |
|-----------|-----|------------|------------------|-----------------------|-------------|------------------|
| wild type | F   | 215        | 1                | 1                     | 2           | 1.75             |
|           | F   | 175        | 0                | 1                     | 1           |                  |
|           | F   | 202        | 1                | 1                     | 2           |                  |
|           | M   | 210        | 1                | 1                     | 2           |                  |
| Tg-G0     | F   | 245        | 0                | 1                     | 1           | 2                |
|           | F   | 187        | 0                | 1                     | 1           |                  |
|           | F   | 202        | 1                | 1                     | 2           |                  |
|           | M   | 245        | 0                | 2                     | 2           |                  |
|           | M   | 245        | 1                | 2                     | 3           |                  |
|           | M   | 187        | 1                | 2                     | 3           |                  |
| Tg-G2     | F   | 203        | 0                | 1                     | 1           | 1.5              |
|           | F   | 219        | 0                | 0                     | 0           |                  |
|           | F   | 215        | 1                | 2                     | 3           |                  |
|           | M   | 219        | 0                | 1                     | 1           |                  |
|           | M   | 210        | 1                | 1                     | 2           |                  |
|           | M   | 210        | 1                | 1                     | 2           |                  |

Numbers in each category are the average of scores from two independent pathologists examining the same TEM images who were blinded to specimen identity.

<sup>1</sup> GBM thickness irregularities (0=normal; 1=mildly/focally abnormal; 2=diffusely abnormal)

<sup>2</sup> Podocyte foot process effacement (0=0-10%; 1=11-25%; 2=26-50% 3=51-75%; 4=>75%)

**Supplemental Table 3:** Standard serologic chemistries in pregnant mice (mean±SD).

| <b>Serum test</b>    | <b>units</b> | <b>normal range</b> | <b>Wild-type pregnant<br/>(n=6)</b> | <b>Transgenic pregnant<br/>(n=9)</b> | <b>Transgenic pregnant with seizure<br/>(n=2)*</b> |
|----------------------|--------------|---------------------|-------------------------------------|--------------------------------------|----------------------------------------------------|
| ALT(GPT)             | U/L          | 10-77               | 41±12                               | 81±69                                | 44 (30-58)                                         |
| Alkaline Phosphatase | U/L          | 15-96               | 41±7                                | 36±11                                | 57 (49-64)                                         |
| Total Bilirubin      | mg/dL        | 0-1.0               | 0.1±0.1                             | 0.2±0.2                              | 0.2 (0.1-0.3)                                      |
| Cholesterol          | mg/dL        | 50-250              | 112±17                              | 133±86                               | 127 (104-150)                                      |
| Total Protein        | g/dL         | 3.5-7.2             | 4.1±0.2                             | 3.9±0.4                              | 4.6 (4.4-4.7)                                      |
| Albumin              | g/dL         | 2.5-6.5             | 2.4±0.1                             | 2.3±0.3                              | 2.6 (2.3-2.9)                                      |
| Globulin             | g/dL         | 1.0-2.0             | 1.7±0.2                             | 1.6±0.2                              | 1.5 (1.2-1.8)                                      |
| Urea Nitrogen        | mg/dL        | 8-33                | 23±11                               | 42±17                                | 31 (30-31)                                         |
| Creatinine           | mg/dL        | 0.2-2.2             | 0.2±0.1                             | 0.2±0.3                              | 0.2 (0.1-0.2)                                      |
| Glucose              | mg/dL        | 62-175              | 222±19                              | 210±21                               | 104 (98-109)                                       |
| Calcium              | mg/dL        | 7.1-15.5            | 9.0±0.2                             | 8.4±1.0                              | 9.3 (9.1-9.4)                                      |
| Sodium               | mmol/L       | 140-160             | 147±4                               | 143±5                                | 156 (150-153)                                      |
| Potassium            | mmol/L       | 5.0-7.5             | 7.2±0.9                             | 7.5±1.8                              | 5.5 (4.9-6.1)                                      |
| Chloride             | mmol/L       | 88-115              | 113±4                               | 109±3                                | 113 (113-113)                                      |

\* mean (range)

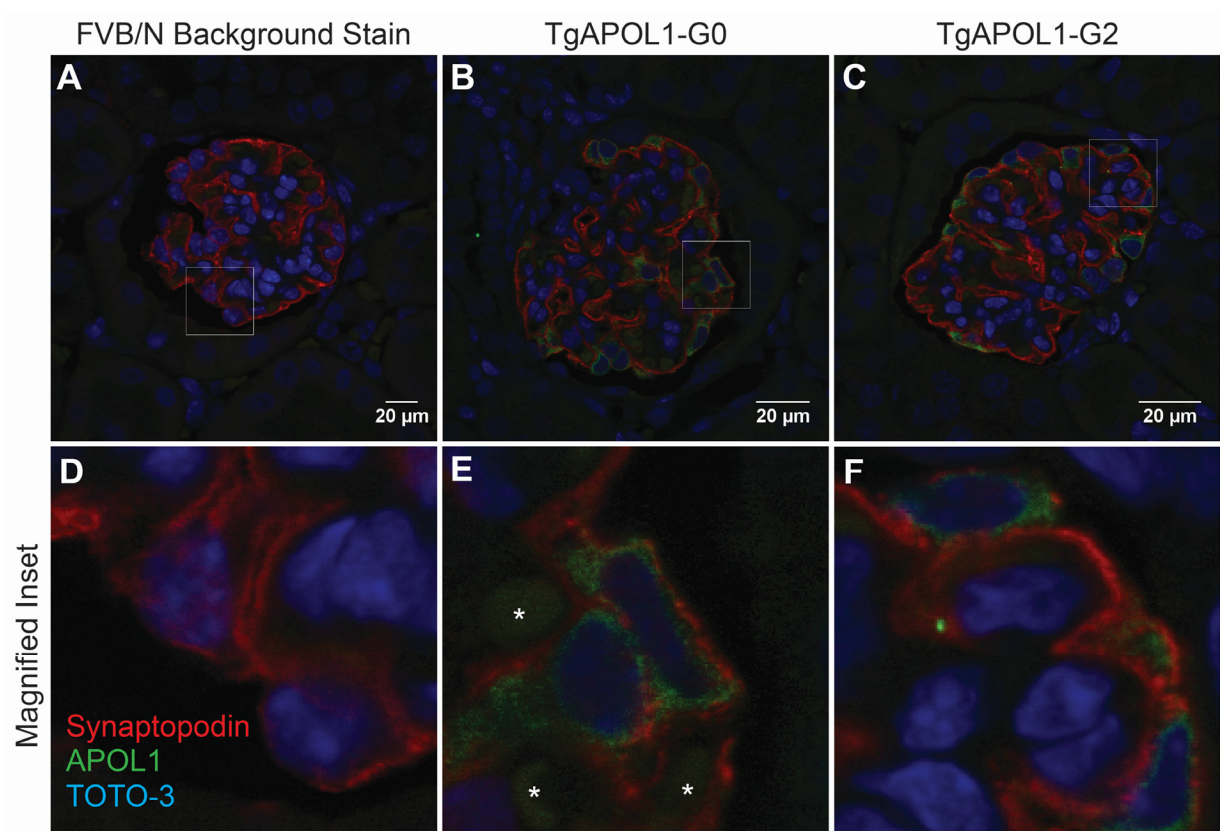

**Supplemental Figure 1:** APOL1 was present in glomerular cells that are positive for Synaptopodin. Immunofluorescent co-staining with APOL1 and Synaptopodin in a non-transgenic wild-type FVB/N (**A, D**), transgenic APOL1-G0 (**B, E**), and transgenic APOL1-G2 (**C, F**) mouse kidneys. White boxes in A-C are magnified insets shown in D-E and demonstrate APOL1 (green) and Synaptopodin (red) labeled the same cell and that the APOL1 staining is cytoplasmic. Nuclear stain was TOTO-3 (blue). Asterisks (\*) indicate autofluorescence of red blood cells in capillary loops. There was no APOL1 staining in tubules.

### A. Founders

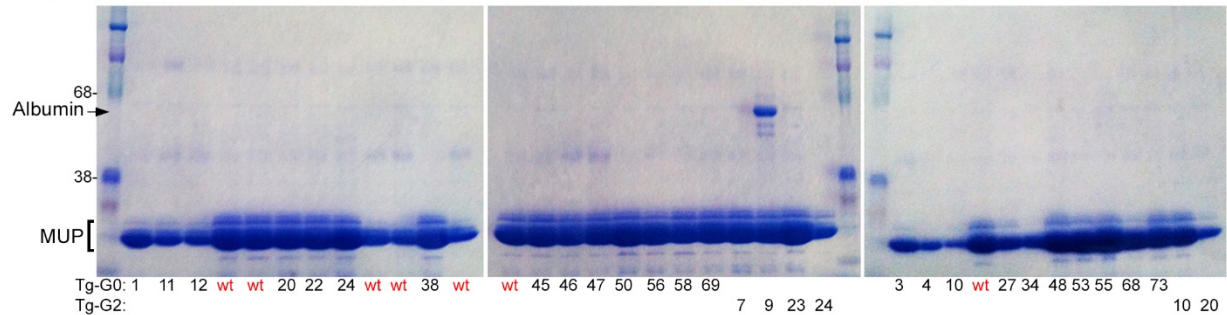

### B. Lines

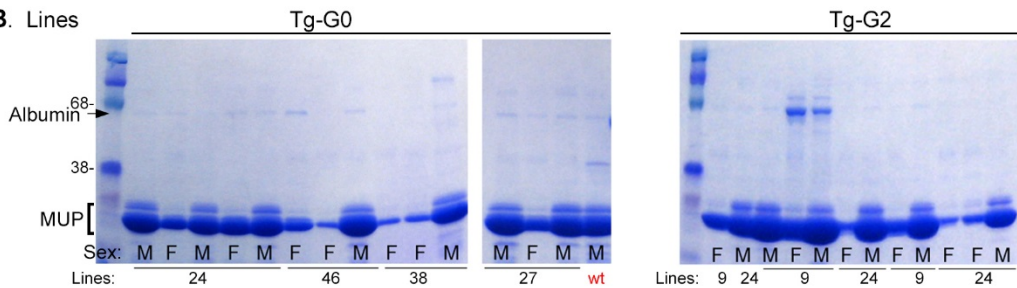

### Supplemental Figure 2: No proteinuria in founders and offspring of established lines.

Coomassie-stained polyacrylamide gels of mouse urine noting the molecular weight of albumin (arrow) and the low molecular weight proteins common in mouse urine (MUP, major urinary proteins). **A.** Proteinuria of all surviving founders at terminal sacrifice (mean age of 302 days; see Supplemental Table 1 for exact age at sacrifice for each founder). **B.** Proteinuria in aged offspring from each of the six established transgenic lines (Tg-G0: lines 24, 27, 38, 46 and Tg-G2: lines 9, 24). Mean ages for the Tg-G0 and Tg-G2 mice shown on gel were 278 and 254 days respectively. Sample groupings designated by the line under the gel are littermates; founder number given below line, and sex (M, male; F, female) given above line. Wild-type (wt), non-transgenic mice in both A and B are age-matched.

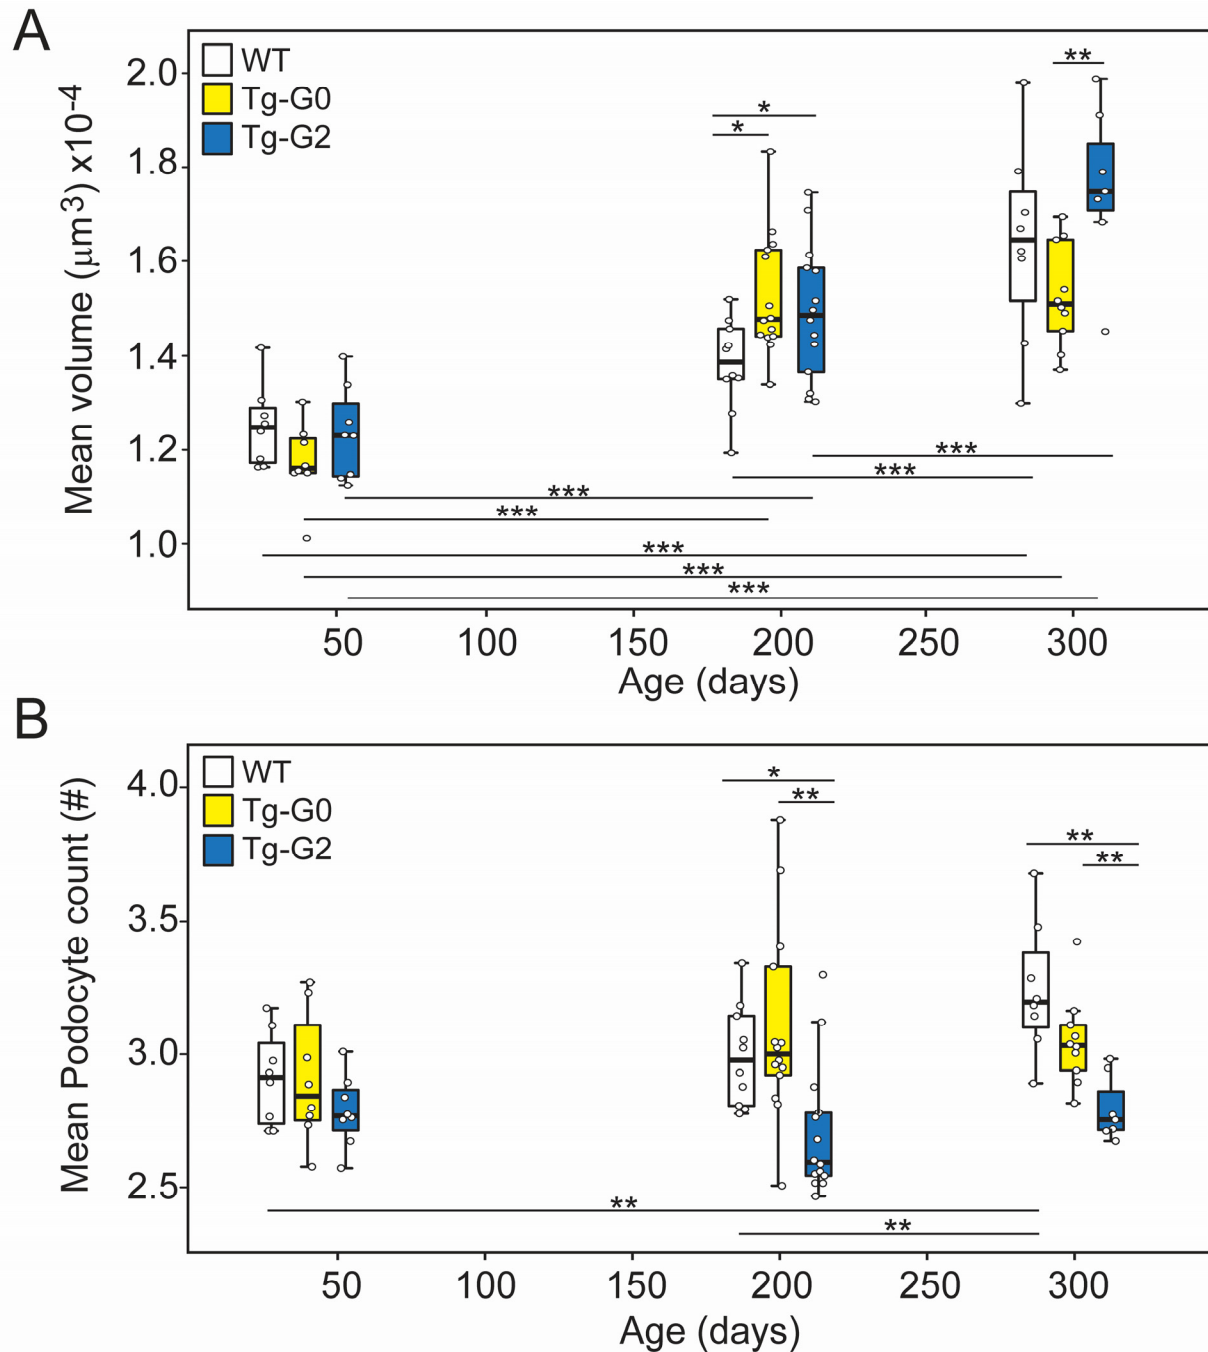

**Supplemental Figure 3:** Corrected podocyte number and glomerular tuft volumes used in Figure 4 podocyte density calculations. Mean glomerular tuft volume (**A**) and mean podocyte number (**B**) per glomerular tuft for each mouse, stratified by genotype. Approximately 100 glomeruli/mouse were counted; each circle represents one mouse. \* $P < 0.05$ , \*\* $P < 0.01$ , \*\*\* $P < 0.001$  by ANOVA. Numbers in each group are the same as reported for Figure 4.

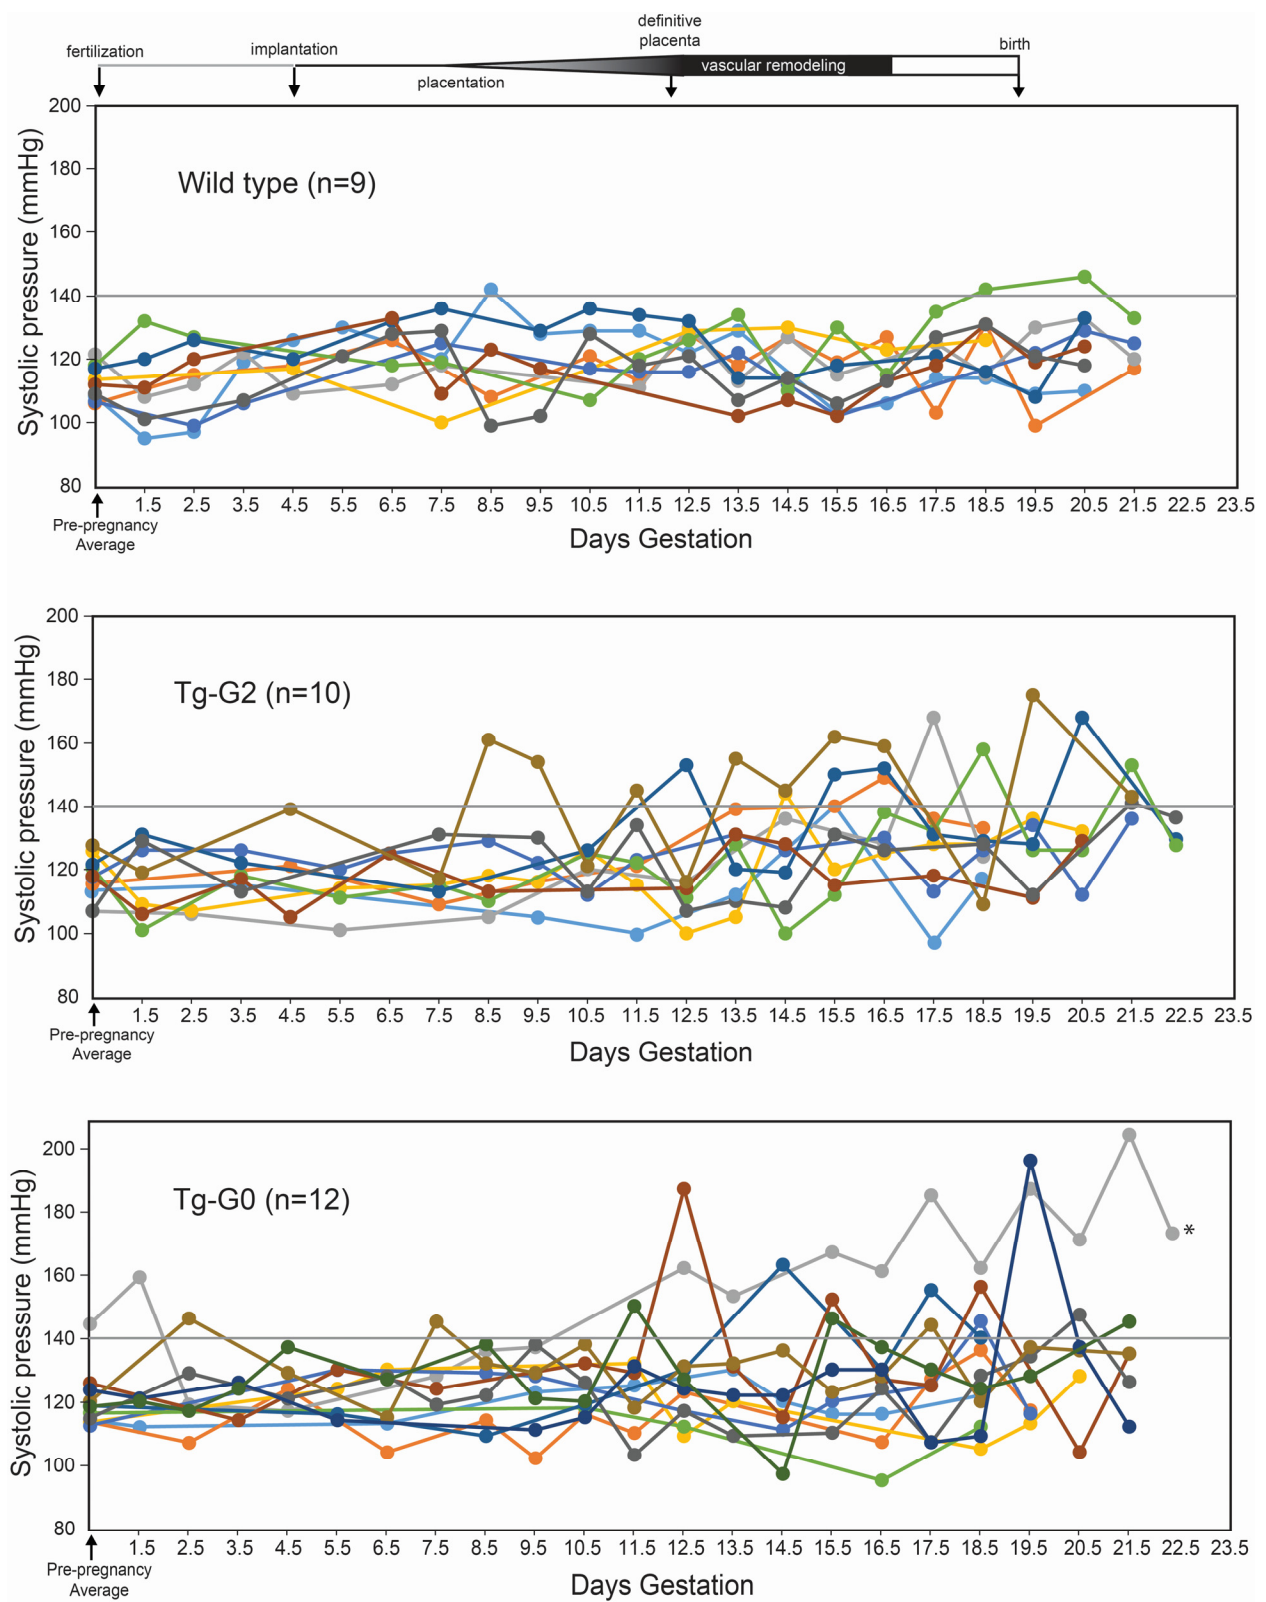

**Supplemental Figure 4.**

**Supplemental Figure 4 legend.** Tg-G0 and Tg-G2 mice had pregnancy-associated hypertension. Systolic blood pressures were recorded with tail cuff plethysmography; each line represents a single animal. **A.** Wild type, non-transgenic (n=9). **B.** Tg-G0 (n=12). **C.** Tg-G2 (n=10). Day 0.5 is the morning of the appearance of a postcoital vaginal plug. Time point zero is the pre-pregnancy average, the last pregnancy reading is on day 18.5, with full-term delivery on day 19, and postpartum blood pressure readings beginning on day 19.5 were recorded until pressures fell below 140mmHg. Asterisk (\*) indicates a hypertensive female that became moribund and was euthanized. Some mice were sacrificed at day 18.5 to collect serum samples for sFlt-1 and APOL1 ELISAs and there are no postpartum readings for these animals. At top is a schematic for the time line of placental development, beginning at implantation at day 4 with placentation complete (definitive placenta) by day 12. Placentas grow in proportion to fetal growth from day 12 to term on day 19, although vascular remodeling takes place from day 12 to day 16.

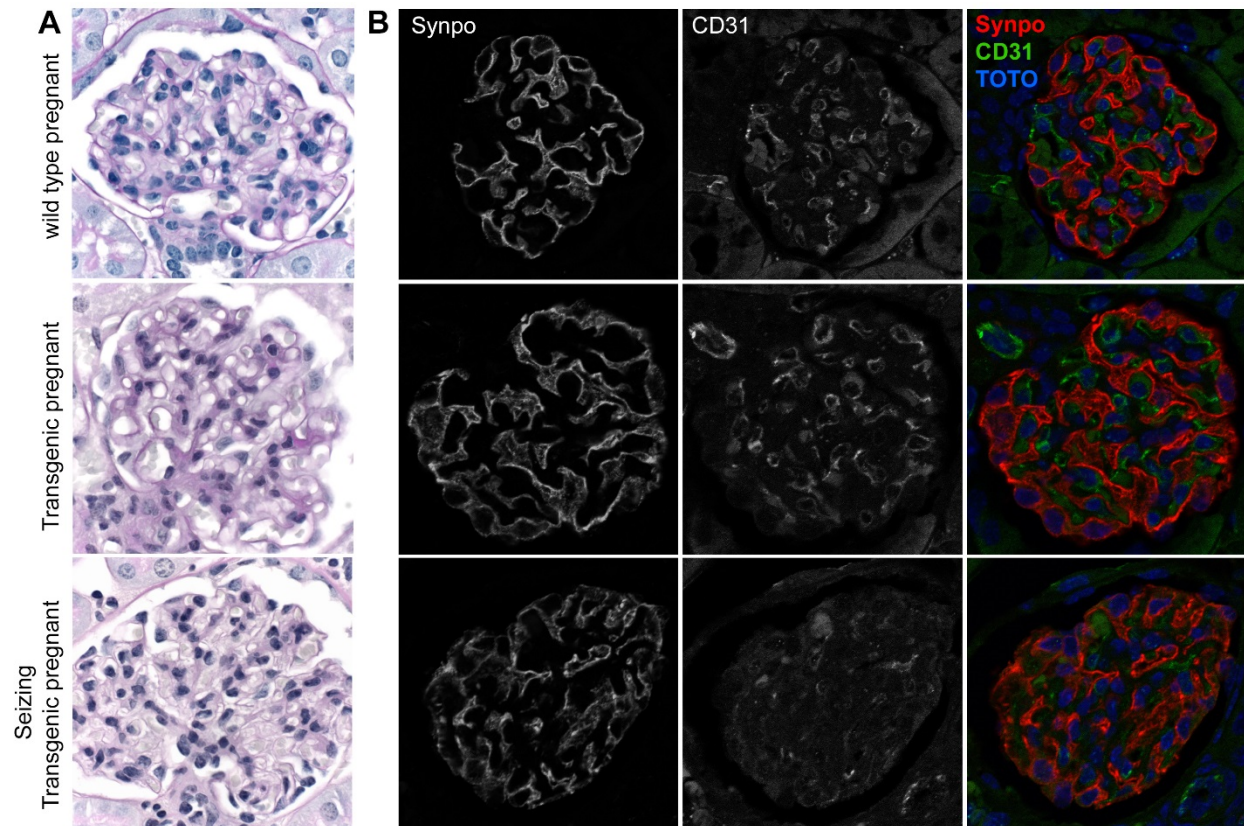

**Supplemental Figure 5:** Endothelial changes in glomeruli of seizing pregnant mice. **A.** Histology (PAS stain) of pregnant mouse kidneys. **B.** Immunostaining for Synaptopodin (Synpo) as a podocyte marker and CD31 as an endothelial marker (TOTO3 as a nuclear stain) showing diminished CD31 staining in the seizing transgenic pregnant glomeruli.

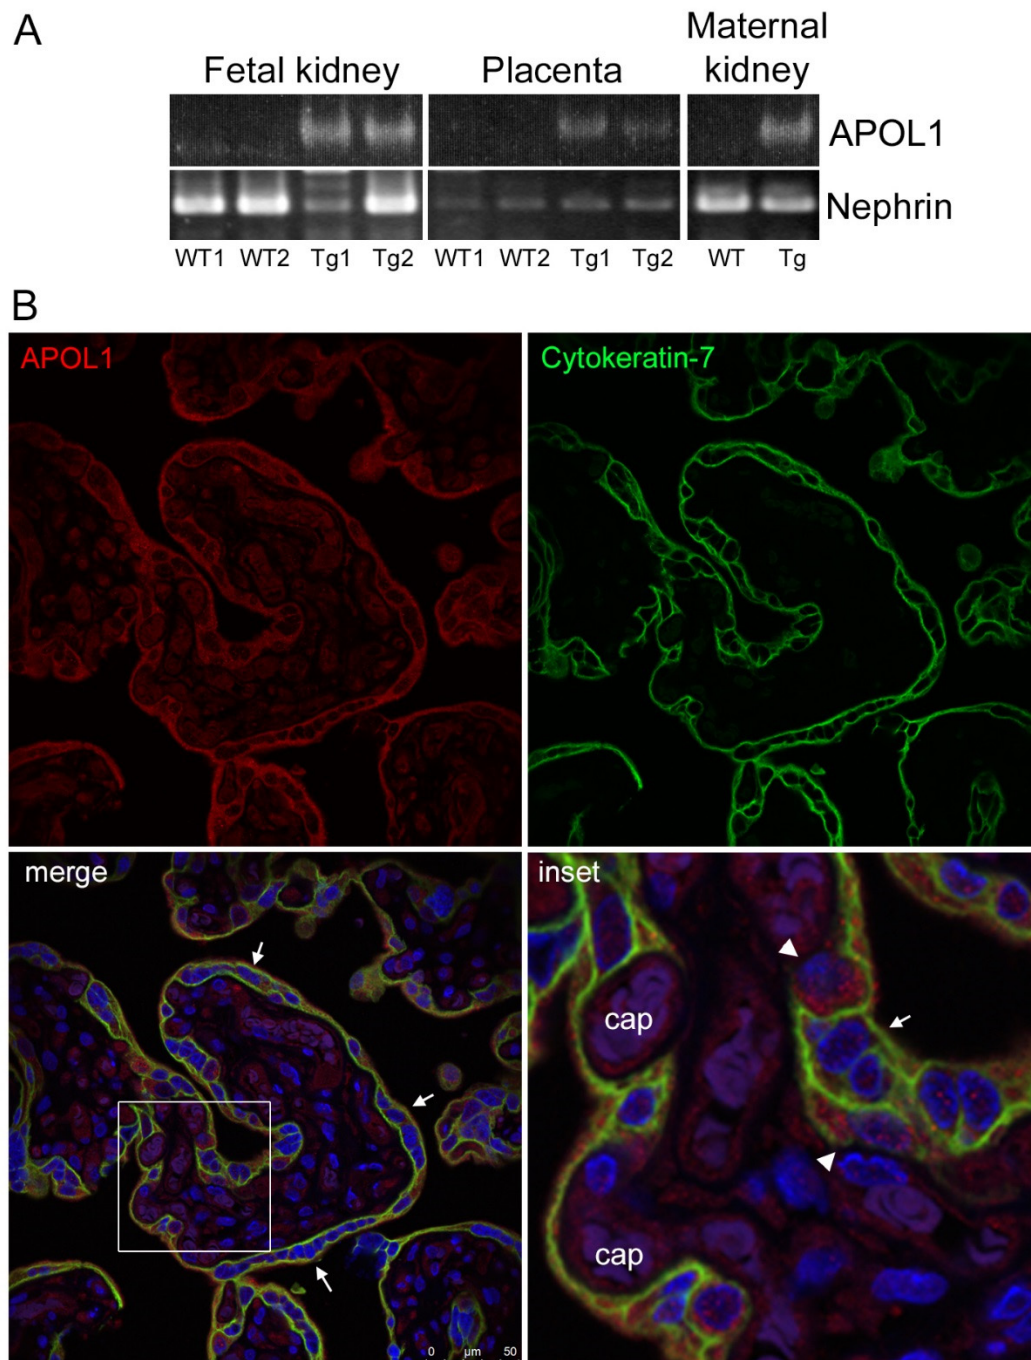

**Supplemental Figure 6:** APOL1 was expressed in transgenic mouse and human placentas. **A.** RT/PCR of total cellular RNA extracted from mouse fetal tissues using primers for murine Nephrin (endogenous Nephrin expression) and human APOL1 (expression originating from the transgene). Wild-type (WT) and transgenic (Tg) fetuses were dissected from their placentas, and fetal kidneys were removed. Two wild-type FVB/N pregnant and two Tg-G0 pregnant mice

were examined (days gestation: WT1 = e16.5; WT2 = e18.5; Tg1 = e14.5; Tg2 = e17.5). As a positive and negative control, maternal kidneys from one of the wild-type and Tg-G0 dams were similarly analyzed. **B.** Immunostaining for APOL1 (red) and Cytokeratin-7 (green, a marker for trophoblasts) in a term human placenta from an uncomplicated pregnancy. Nuclei were labeled with DAPI (blue). Merged image and inset show APOL1 expression in terminal villi syncytiotrophoblasts (arrows) and cytotrophoblasts (arrow heads) which co-label with Cytokeratin-7. Cap, Capillary loop.

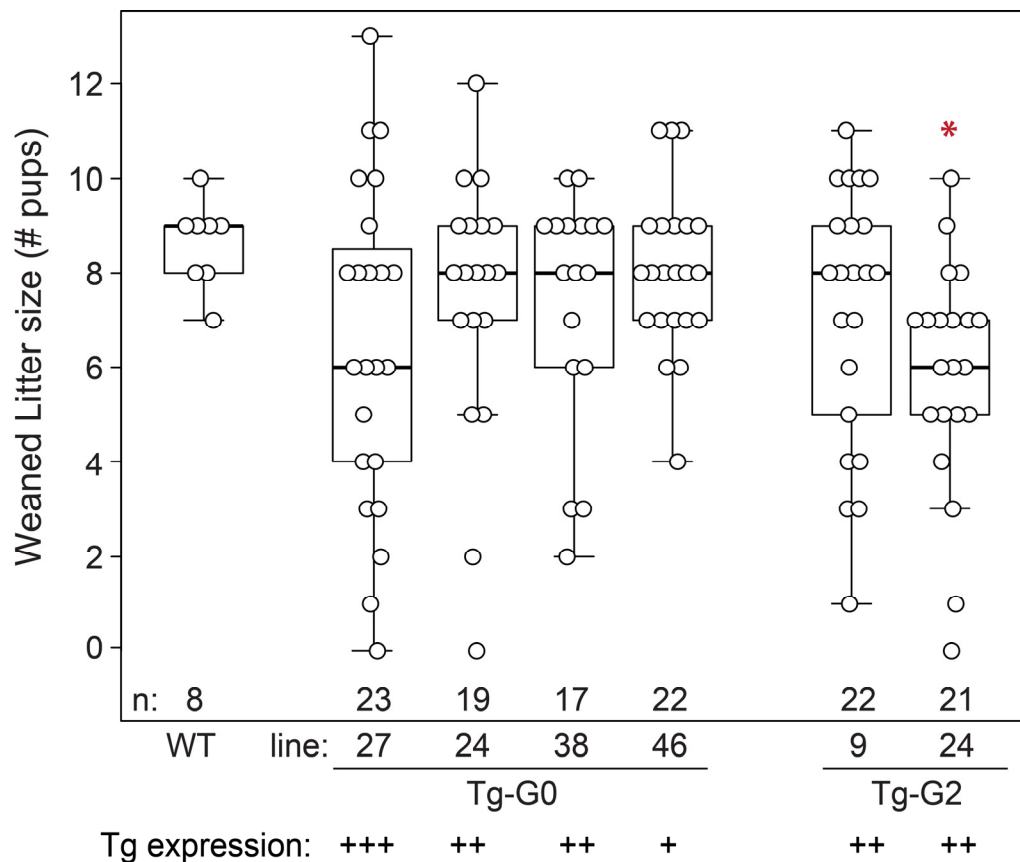

**Supplemental Figure 7:** Weaned litter sizes were smaller for Tg-G2. Boxes are quartiles with a median line and 95<sup>th</sup> percentile whiskers; \* $P=0.004$  compared to wild-type (WT) using t test (with Bonferroni correction for multiple testing,  $P=0.025$ ). The reported average litter size for FVB/N is  $8.8 \pm 0.4$  pups. Number (n) of litters examined for each line are noted on the graph; line number and relative transgene (Tg) expression level for each line is given below graph.
